# Supplementary material for: Locus-specific control of DNA resection and suppression of subtelomeric VSG recombination by HAT3 in the African trypanosome
Source: PubMed Central journal article supplement (PMC4227765; doi:10.1093/nar/gku900), 2014-10-09
Supplement: supp_gku900_nar-01483-x-2014-File003.pdf [file supp_gku900_nar-01483-x-2014-File003.pdf]

**Locus-specific control of DNA break processing and suppression of subtelomeric VSG recombination by HAT3 in the African trypanosome**

Lucy Glover and David Horn

Division of Biological Chemistry & Drug Discovery, College of Life Sciences,  
University of Dundee, Dow Street, Dundee DD1 5EH, UK.

**Supplementary Figure S1**

**Supplementary Table S1**

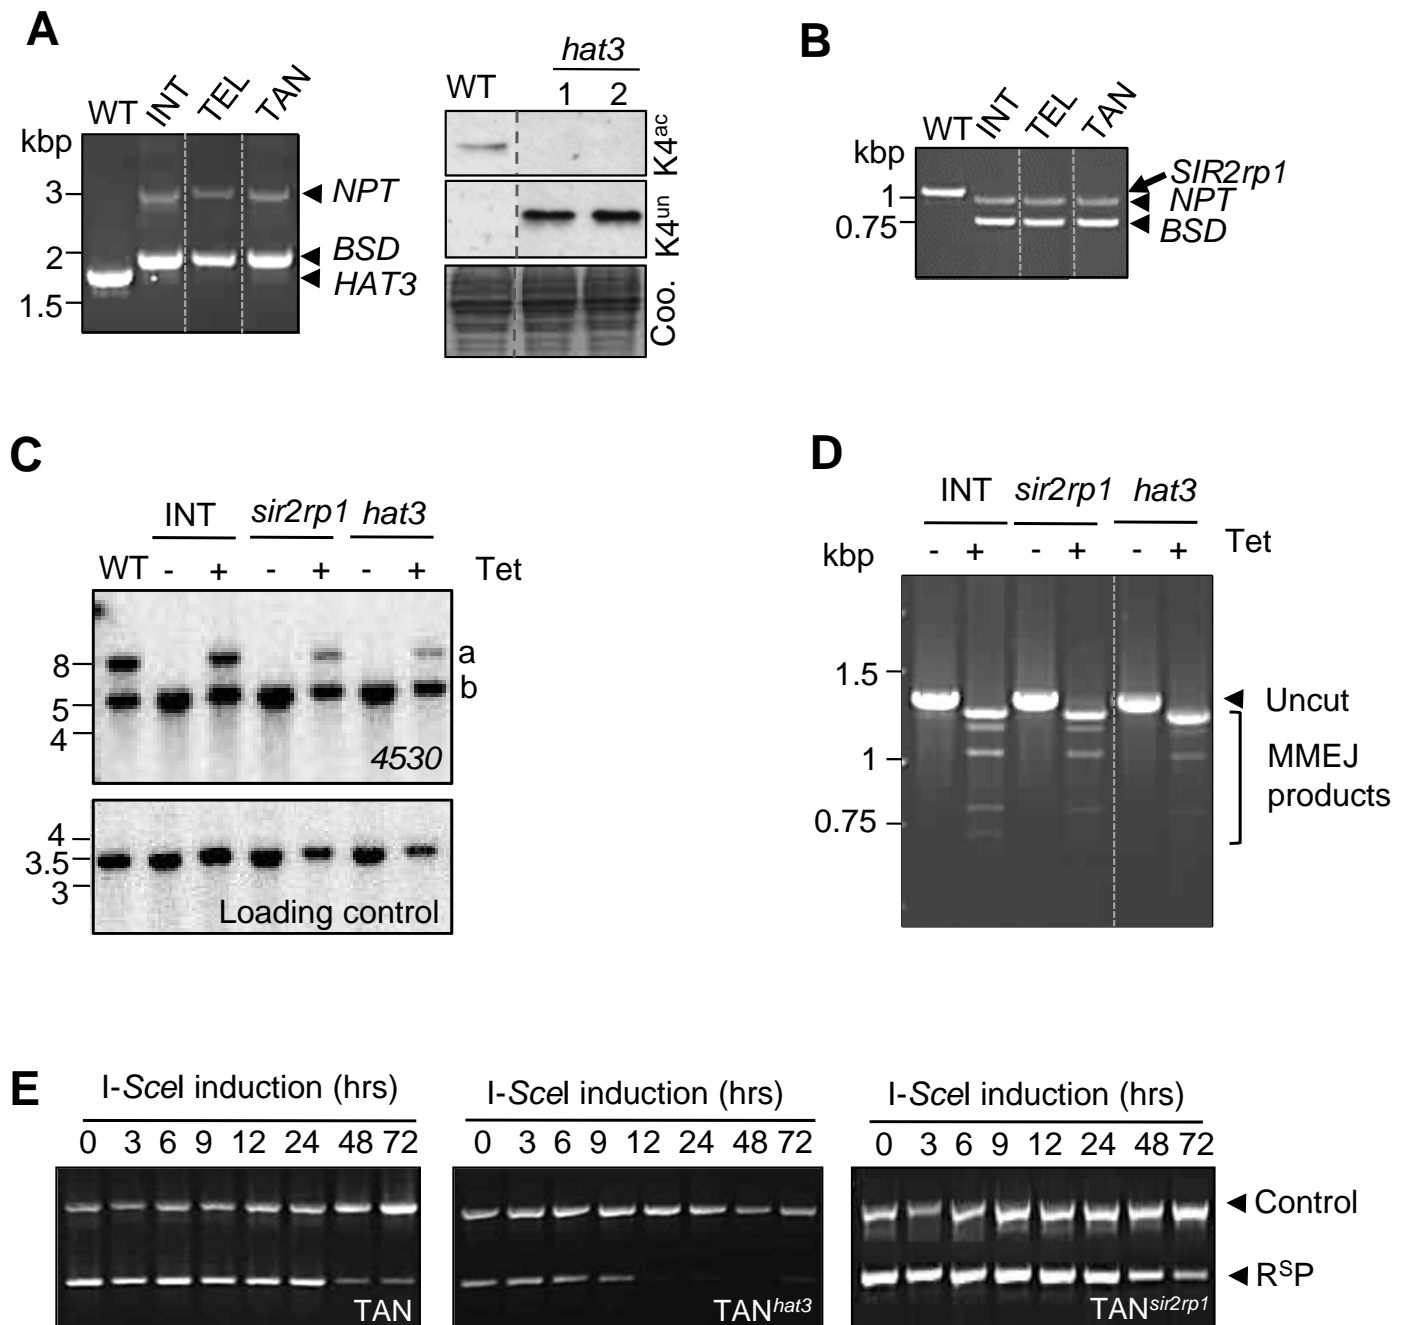

**Supplementary Figure S1.** Validation and assessment of *hat3* and *sir2rp1*-null strains. **(A)** A PCR-based assay (left-hand side) indicates disruption of native *HAT3* and replacement with *NPT* and *BSD* selectable marker cassettes in the INT, TEL and TAN-strains. The western blot (right-hand side) indicates loss of acetylation on histone H4K4 and confirms loss of *HAT3* function (Siegel *et al.*, 2008). K4<sup>ac</sup>, anti-H4K4<sup>acetylated</sup>; K4<sup>un</sup>, anti-H4K4<sup>unmodified</sup>; WT, wild-type. An equivalent Coomassie-stained gel serves as a loading-control. **(B)** A PCR-based assay indicates disruption of native *SIR2rp1* and replacement with *NPT* and *BSD* selectable-marker cassettes in the INT, TEL and TAN-strains. **(C)** Southern blotting indicates DSB-repair in the INT-strain and in the derived *sir2rp1* and *hat3* null-strains. The loading control was prepared using a '7240' probe also from chr. 11 (see Materials & Methods). Other details are as for Figure 1C. **(D)** A PCR-based assay indicates a similar pattern of MMEJ in INT-cells and in the *sir2rp1* and *hat3* null-strains (see Glover *et al.*, 2011). **(E)** A PCR-based assay indicates more rapid loss of the R<sup>S</sup>P (*RFP:I-SceI:PAC*) 'DNA-break substrate' cassette following I-SceI induction in the TAN<sup>*hat3*</sup> strain.

Supplementary Table S1

| Oligonucleotide  | Sequence                                  |
|------------------|-------------------------------------------|
| hat3koF / H31    | ccactagtaccccagtaga                       |
| hat3koR / H34    | ctggtacctcagaaacagg                       |
| sir2rp1koF / 3C  | ggcaagctgggtggcttt                        |
| sir2rp1koR / 5B  | cccgctcgtcattctctg                        |
| MMEJF / RFP5FU   | <i>gatcaagcttat</i> gggtgcgctcctccaag     |
| MMEJR / Pac3Pol1 | <i>gatcgctagatc</i> aggcaccgggcttgc       |
| 4250F / 1.55F    | gatcttaattaaatggtaggaggatatttacgt         |
| 4250R / 1.55R    | gatctctagatcggcttagttccgcac               |
| SceJF            | gcggatagggataacaggg                       |
| rad51tarN5F      | <i>gatcgcgccgctg</i> ctacactactgctaccg    |
| rad51tarX5R      | <i>gatctctagaaag</i> caactccatagttttcc    |
| rad51tarB3F      | <i>gatcgggccc</i> acatgcctccactacacgg     |
| rad51tarA3R      | <i>gatcggtagc</i> accagcaaggcagatcaagtatc |

Sequences of oligonucleotides used for cloning or PCR assays. Relevant restriction sites are indicated in italics.
